# Supplementary material
Source: PubMed Central journal article supplement (PMC7605151)
Supplement: NIHMS1618933-supplement-Supplemental_Material.pdf [file NIHMS1618933-supplement-Supplemental_Material.pdf]

# SUPPLEMENTAL MATERIALS

Platelet Dysfunction and Thrombosis in JAK2<sup>V617F</sup>-Mutated Primary Myelofibrotic Mice

Shinobu Matsuura<sup>1\*</sup>, Cristal R. Thompson<sup>1\*</sup>, Mostafa Elmokhtra Belghasem<sup>2</sup>, Roelof H. Bekendam<sup>3</sup>, Andrew Piasecki<sup>1</sup>, Orly Leiva<sup>1</sup>, Anjana Ray<sup>4</sup>, Joseph Italiano<sup>4</sup>, Moua Yang<sup>5</sup>, Glenn Merrill-Skoloff<sup>5</sup>, Vipul C. Chitalia<sup>6</sup>, Robert Flaumenhaft<sup>5</sup> and Katya Ravid<sup>1#</sup>

<sup>1</sup>Department of Medicine and Whitaker Cardiovascular Institute, Boston University School of Medicine, Boston MA 02118, USA; <sup>2</sup>Department of Pathology, Boston University School of Medicine, Boston MA 02118, USA; <sup>3</sup> Department of Medicine, Boston University School of Medicine, Boston, MA, USA; <sup>4</sup>Department of Medicine, Brigham and Women's Hospital, Boston MA 02115; <sup>5</sup>Division of Hemostasis and Thrombosis, Department of Medicine, Beth Israel Deaconess Medical Center, Harvard Medical School, Boston, MA 02115; <sup>6</sup>Renal Section, Department of Medicine, Boston University School of Medicine, Boston, MA, USA;

\* These authors equally contributed to the study

**A**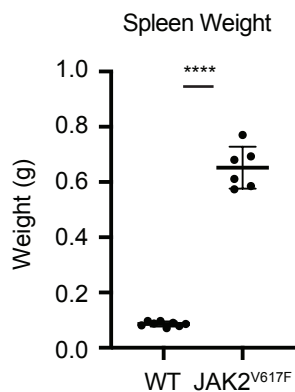**B**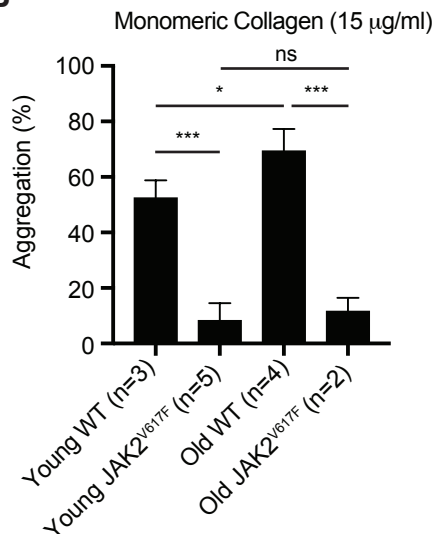**C**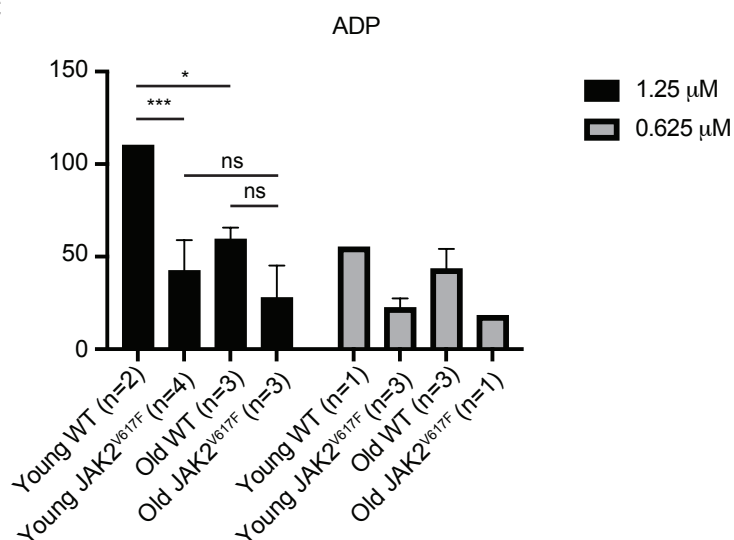**D**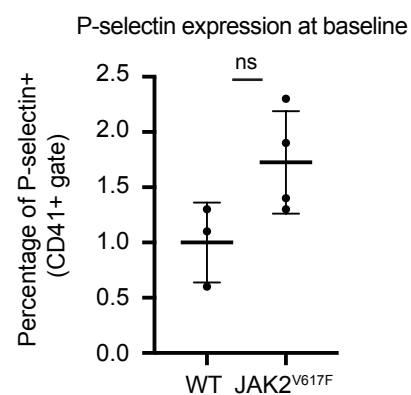

Supplemental Figure I. (A) Spleen weight. Data represent WT ( $n = 8$ ) and JAK2<sup>V617F</sup> ( $n = 6$ ) 34 weeks old males. (B) and (C) Aggregation of washed platelets to monomeric collagen (B) and ADP (C) from 11 weeks old (Young) and 37 to 40 weeks old (Old) male WT and JAK2<sup>V617F</sup> mice are shown. The number of animals in each group is indicated in the figure. Statistical analysis was not performed for 0.625  $\mu\text{M}$  ADP due to insufficient sample number in some groups. (D) P-selectin expression in washed platelets at baseline. Data represent WT ( $n = 3$ ) and JAK2<sup>V617F</sup> ( $n = 4$ ) 10 weeks old females. Data are from the same experiment shown in Figure 3B. ns = not significant, \*  $p < 0.05$ , \*\*\*  $p < 0.001$ , \*\*\*\*  $p < 0.0001$ .

## Major Resources Table

In order to allow validation and replication of experiments, all essential research materials listed in the Methods should be included in the Major Resources Table below. Authors are encouraged to use public repositories for protocols, data, code, and other materials and provide persistent identifiers and/or links to repositories when available. Authors may add or delete rows as needed.

### Animals (in vivo studies)

| Species             | Vendor or Source       | Background Strain | Sex             | Persistent ID / URL                                                               |
|---------------------|------------------------|-------------------|-----------------|-----------------------------------------------------------------------------------|
| <i>Mus musculus</i> | The Jackson Laboratory | C57BL/6J          | Male and female | <a href="https://www.jax.org/strain/000664">https://www.jax.org/strain/000664</a> |

### Genetically Modified Animals

| Species             | Vendor or Source                                        | Background Strain       | Other Information                                     | Sex             | Persistent ID / URL                                                                                                                                       |
|---------------------|---------------------------------------------------------|-------------------------|-------------------------------------------------------|-----------------|-----------------------------------------------------------------------------------------------------------------------------------------------------------|
| <i>Mus musculus</i> | Gift of Dr. Zhizhuang Joe Zhao (University of Oklahoma) | C57BL/6XDBA/2 x C57BL/6 | Transgene: Tg(Vav1-JAK2*V617F)AZjz, Location: unknown | Male and female | Tg(Vav1-JAK2*V617F)AZjz/MGI:5441310/<br><a href="http://www.informatics.jax.org/allele/MGI:5441310">http://www.informatics.jax.org/allele/MGI:5441310</a> |

### Antibodies

| Target antigen                                          | Vendor or Source                      | Catalog #     | Working concentration                                                 | Lot # (preferred but not required) | Persistent ID / URL                                                                                                                                                                                                                                                                                                                                                           |
|---------------------------------------------------------|---------------------------------------|---------------|-----------------------------------------------------------------------|------------------------------------|-------------------------------------------------------------------------------------------------------------------------------------------------------------------------------------------------------------------------------------------------------------------------------------------------------------------------------------------------------------------------------|
| Dylight 649-labeled anti-GPIb $\alpha$ antibody (CD42b) | Emfret Analytics                      | M040-3        | <u>(0.1<math>\mu</math>g/g)</u>                                       |                                    | <a href="https://www.emfret.com/index.php?id=shop&amp;no_cache=1&amp;tx_feproducts_pi1%5Ba%5D=details&amp;tx_feproducts_pi1%5BCatNo%5D=M040-3&amp;cHash=6b06abb0b4394bc4b597fca00d4ed04c">https://www.emfret.com/index.php?id=shop&amp;no_cache=1&amp;tx_feproducts_pi1%5Ba%5D=details&amp;tx_feproducts_pi1%5BCatNo%5D=M040-3&amp;cHash=6b06abb0b4394bc4b597fca00d4ed04c</a> |
| Dylight 488-labeled anti-fibrin antibody (59D8)         | Millipore Sigma, in-house conjugation | MABS2155-25UG | <u>(0.1<math>\mu</math>g/g)</u>                                       |                                    | <a href="https://www.emdmillipore.com/US/en/product/Anti-Fibrin-Antibody-clone-59D8,MM_NF-MABS2155-25UG">https://www.emdmillipore.com/US/en/product/Anti-Fibrin-Antibody-clone-59D8,MM_NF-MABS2155-25UG</a>                                                                                                                                                                   |
| FITC conjugated rat anti-mouse GPVI                     | Emfret Analytics                      | M011-1        | 1:100<br><u>(antibody concentration not provided by manufacturer)</u> | 0111-C                             | <a href="https://www.emfret.com/index.php?id=shop&amp;no_cache=1&amp;tx_feproducts_pi1%5Ba%5D=details&amp;tx_feproducts_pi1%5BCatNo%5D=M011-1&amp;cHash=60b1ac28e94cb34d1ee7480f39485661">https://www.emfret.com/index.php?id=shop&amp;no_cache=1&amp;tx_feproducts_pi1%5Ba%5D=details&amp;tx_feproducts_pi1%5BCatNo%5D=M011-1&amp;cHash=60b1ac28e94cb34d1ee7480f39485661</a> |
| Anti-mouse CD49b FITC                                   | eBioscience                           | 11-0491-82    | 1:100 ( <u>5<math>\mu</math>g/ml</u> )                                | 2030279                            | <a href="https://www.thermofisher.com/anti">https://www.thermofisher.com/anti</a>                                                                                                                                                                                                                                                                                             |

DOI [to be added]

|                                                                    |               |            |                                        |         |                                                                                                                                                                                                                                                                                                                                                                                             |
|--------------------------------------------------------------------|---------------|------------|----------------------------------------|---------|---------------------------------------------------------------------------------------------------------------------------------------------------------------------------------------------------------------------------------------------------------------------------------------------------------------------------------------------------------------------------------------------|
| (integrin subunit $\alpha$ 2)                                      |               |            |                                        |         | body/product/CD49b-Integrin-alpha-2-Antibody-clone-HMa2-Monoclonal/11-0491-82                                                                                                                                                                                                                                                                                                               |
| Alexa Fluor 647 Hamster Anti-Rat CD29 (integrin subunit $\beta$ 1) | BD Pharmingen | 562153     | 1:200 ( <u>1<math>\mu</math>g/ml</u> ) | 7242661 | <a href="https://www.bdbiosciences.com/eu/reagents/research/antibodies-buffers/immunology-reagents/anti-rat-antibodies/cell-surface-antigens/alex-fluor-647-hamster-anti-rat-cd29-ha25/p/562153">https://www.bdbiosciences.com/eu/reagents/research/antibodies-buffers/immunology-reagents/anti-rat-antibodies/cell-surface-antigens/alex-fluor-647-hamster-anti-rat-cd29-ha25/p/562153</a> |
| PE Rat Anti-mouse CD41a                                            | eBioscience   | 12-0411-83 | 1:200 ( <u>1<math>\mu</math>g/ml</u> ) | 4344262 | <a href="https://www.thermofisher.com/antibody/product/CD41a-Antibody-clone-eBioMWRReg30-MWRReg30-Monoclonal/12-0411-82">https://www.thermofisher.com/antibody/product/CD41a-Antibody-clone-eBioMWRReg30-MWRReg30-Monoclonal/12-0411-82</a>                                                                                                                                                 |
| FITC Rat anti-mouse CD62p (p-selectin)                             | BD Pharmingen | 553744     | 1:100 ( <u>5<math>\mu</math>g/ml</u> ) | 76900   | <a href="https://www.bdbiosciences.com/us/applications/research/t-cell-immunology/regulatory-t-cells/surface-markers/mouse/fits-rat-anti-mouse-cd62p-rb4034/p/553744">https://www.bdbiosciences.com/us/applications/research/t-cell-immunology/regulatory-t-cells/surface-markers/mouse/fits-rat-anti-mouse-cd62p-rb4034/p/553744</a>                                                       |
| APC Rat anti-mouse CD41a                                           | eBioscience   | 17-0411-82 | 1:100 ( <u>2<math>\mu</math>g/ml</u> ) | 1995462 | <a href="https://www.thermofisher.com/antibody/product/CD41a-Antibody-clone-eBioMWRReg30-MWRReg30-Monoclonal/17-0411-82">https://www.thermofisher.com/antibody/product/CD41a-Antibody-clone-eBioMWRReg30-MWRReg30-Monoclonal/17-0411-82</a>                                                                                                                                                 |
